## Research Article

# Whole exome sequencing identified a new compound heterozygous *PRKN* mutation in a Chinese family with early-onset Parkinson's disease

Tianbai Li<sup>1,2</sup>, Daqing Kou<sup>3</sup>, Yanhua Cui<sup>1,2,4</sup> and  Weidong Le<sup>1,2</sup>

<sup>1</sup>Center for Clinical Research on Neurological Diseases, The First Affiliated Hospital, Dalian Medical University, Dalian 116021, China; <sup>2</sup>Liaoning Provincial Key Laboratory for Research on the Pathogenic Mechanisms of Neurological Diseases, The First Affiliated Hospital, Dalian Medical University, Dalian 116021, China; <sup>3</sup>Department of Clinical Laboratory, The First Affiliated Hospital, Dalian Medical University, Dalian 116021, China; <sup>4</sup>International Education College, Dalian Medical University, Dalian 116044, China

Correspondence: Weidong Le (wdle@sibs.ac.cn)

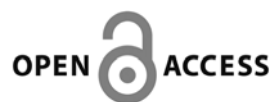

Early-onset Parkinson's disease (EOPD) is usually caused by genetic variants and patients with EOPD develop symptoms before the age of 50, accounting for 5% Parkinson's disease (PD). Here we present a Chinese Han pedigree with clinical features of EOPD. To determine the diagnosis and pathogenic mutations of this pedigree, whole exome sequencing, Sanger sequencing and real-time quantitative PCR were performed to detect all the four family members. Our results showed that a new form of compound heterozygous mutation in the *PRKN* gene, consisting of heterozygous point mutation c.850G > C (p.G284R) along with exon 4 deletion, is the causative genetic factor for EOPD in this pedigree. These discoveries may have implications for genetic counseling, clinical management and developing *PRKN* target gene therapy strategy.

## Introduction

Parkinson's disease (PD) is a progressive neurodegenerative disorder that results primarily from the death of dopaminergic neurons in the substantia nigra [1,2]. As the second most frequent neurodegenerative disease after Alzheimer's disease, PD typically occurs in people over the age of 60, of which approximately 1% are affected [3,4]. When it is seen in patients before the age of 50, it is called early-onset PD (EOPD), accounting for 5% of PD [5–7]. The characteristic features of EOPD have been demonstrated to be a better response to dopaminergic drugs, more frequently gait disorder, rest tremor of the legs and limb dystonia comparing with the patients with older age of onset, but cognitive decline and hyposmia are relatively uncommon [5,8].

Although most cases of PD are thought to be sporadic, 5–10% of patients are confirmed to have monogenic forms of the disease [9]. Susceptibility genes for Mendelian-inherited PD have been reported, including *LRRK2*, *SNCA*, *PRKN* (*parkin*), *PINK1*, *GBA*, *PARK7*, *UCHL1*, *ATP13A2*, *VPS35*, *NR4A2* and so on [4,10–12]. The role of pathogenic variants is more conspicuous in EOPD [13]. Among the loss-of-function mutations which cause recessive EOPD such as *PRKN*, *PINK1*, *DJ-1* and *ATP13A2* [8,9], homozygous and compound heterozygous mutations in the *PRKN* gene are responsible for approximately half of recessive-inheritance PD families with onset before the age of 45 years [6].

On account of the phenotypes of EOPD are associated with the age of onset and genotypes, and different genetic backgrounds could generate diverse pathogenesis, a comprehensive family-based genetic testing in EOPD was revealed to be required. Whole exome sequencing (WES) has growingly been utilized as a clinical diagnostic tool of EOPD in recent years, for its advantage in identifying abundant gene mutations and differential diagnosis with other dopa-responsive disorders such as dopa-responsive dystonia (DRD) [14–17]. In the present study, we present a Chinese Han pedigree with clinical features of EOPD and finally confirmed the diagnosis with a new form of compound heterozygous mutation in the *PRKN* gene,

Received: 02 March 2020  
Revised: 22 April 2020  
Accepted: 05 May 2020

Accepted Manuscript online:  
11 May 2020  
Version of Record published:  
20 May 2020

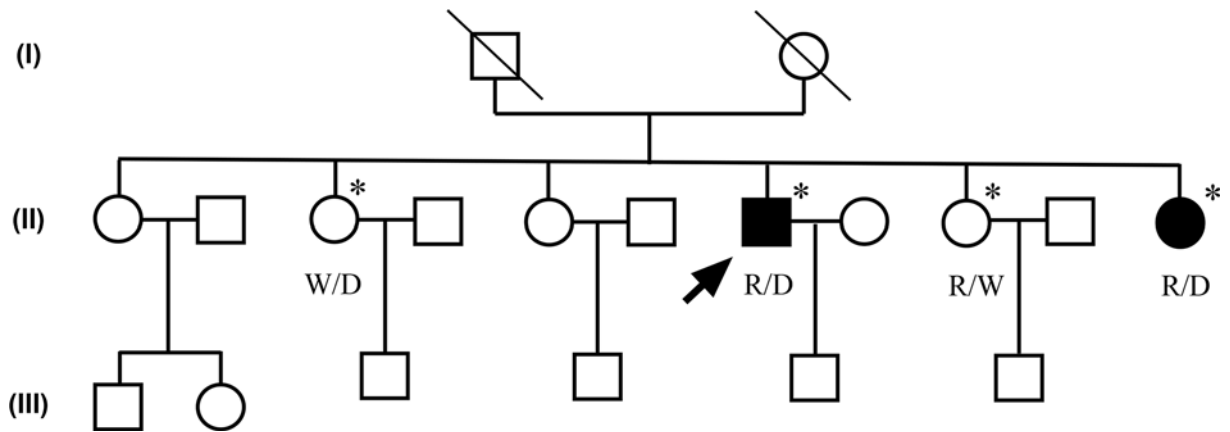

**Figure 1. The EOPD pedigree with the compound heterozygous mutations in the *PRKN* gene**

Pedigree of EOPD with the compound heterozygous mutations of the *PRKN* gene (p. G284R and EX 4 del) showing affected cases (fully shaded). The arrow indicates the proband with EOPD. \*Individuals included in the WES. R, the allele for the p. G284R mutation; D, the allele for the EX 4 del mutation; W, wild-type allele; Circles, women; Squares, men.

consisting of point mutation c.850G > C (p.G284R) along with exon 4 deletion (EX 4 del) using the WES method. This finding may enrich the broad spectrum of genotypes in the EOPD and have implications for genetic counseling.

## Methods

### Subjects

All members of the family recruited in the present study were of Chinese Han descent, who were born in Dalian, China. The kindred comprised three generations, of which two second-generation family members (II: 4, II: 6) were affected (Figure 1). Peripheral blood of four available family members (II: 2, II: 4, II: 5 and II: 6) was sampled for the genetic analysis. All participants had neurological examinations performed. Informed written consent was obtained from all participating subjects in the present study. Ethical approval was obtained from the Ethics Committee of the First Affiliated Hospital of Dalian Medical University (approval number: LCKY2014-29).

### WES

A total of 2 ml peripheral venous blood from the four family members and two healthy controls was drawn into EDTA-anticoagulant tubes. gDNA was extracted from peripheral blood using TaKaRa MiniBEST Whole Blood Genomic DNA Extraction Kit (Takara, Dalian, China). The gDNA samples were submitted to YiZi Corporation (Yizi, Shanghai, China) for WES. Briefly, 1.6 µg of gDNA was sheared into fragments with the Covaris E220. DNA libraries were constructed and the whole exome capture was performed using the Illumina TruSeq™ (Illumina Inc) Exome Enrichment Kit. Massively parallel sequencing was executed by utilizing the Illumina HiSeq2000 platform and version 3 SBS chemistry to generate 100-bp paired-end reads.

### Genomic analysis

Genomic analysis of all the subjects in the present study was carried out by Smartquarier Biotechnology Institute (Shanghai, China). An acceptable quality of sequencing data were substantiated by using FastQC (Version 0.11.2). All reads were aligned using Burrows–Wheeler Aligner against the UCSC hg19 reference genome. Speed-Seq as an open-source genome analysis platform that accomplishes alignment, variant detection of a 50× human genome [18], was utilized to detect single-nucleotide variants (SNPs), structural variants, insertions, deletions and so on. By further using ANNOVAR to annotate the variants and conservative predictions. To predict the pathogenesis of the variants, both of the wild and mutant gDNA sequences were analyzed using the Human Gene Mutation Database (HGMD, <http://www.hgmd.cf.ac.uk/docs>) and ClinVar (<https://www.clinicalgenome.org/data-sharing/clinvar/>). Sanger sequencing was then performed in family members and two healthy controls to confirm the identified potential pathogenic variants. PCR amplification and Sanger sequencing primer sequences are as follows: 5′-CCACGTGATTTGCTTAG-3′ and 5′-TTTCATATCCAGCAATGATCAAA-3′. For the validation of EX 4 del in the *PRKN* gene, we performed gDNA real-time quantitative (RT-qPCR) by using ABI 7500 fast real-time PCR

**Table 1 Mutations in the *PRKN* gene and clinical data of the pedigree**

| Subject                     | II:2    | II:4     | II:5    | II:6     |
|-----------------------------|---------|----------|---------|----------|
| Age (yr)                    | 67      | 62       | 58      | 53       |
| Sex                         | M       | F        | M       | M        |
| Genotype                    | Het     | Com Het  | Het     | Com Het  |
| <i>PRKN</i> p.G284R         | -       | Het      | Het     | Het      |
| <i>PRKN</i> exon 4 deletion | -       | Het      | -       | Het      |
| Phenotype                   | Het     | Affected | -       | Affected |
| Age at onset (yr)           | Carrier | 24       | Carrier | 24       |
| Tremor                      | -       | -        | -       | +        |
| Rigidity                    | -       | +        | -       | +        |
| Bradykinesia                | -       | +        | -       | +        |
| Gait disturbance            | -       | +        | -       | -        |
| Diurnal fluctuations        | -       | +        | -       | -        |
| Hyperreflexia               | -       | +        | -       | +        |
| Effect of levodopa          | -       | +        | -       | +        |
| LID                         | -       | +        | -       | -        |
| Dementia                    | -       | -        | -       | -        |
| Sleep disorders             | -       | -        | -       | -        |

Abbreviations: Com Het, compound heterozygote; F, female; Het, heterozygote; M, male; yr, year.

system (Applied Biosystems, Foster City, CA, United States) in a total volume of 20  $\mu$ l for each reaction. A specific PCR primer pair (5'-GAGTTTCTTGTCTCAATTTAGATGC-3' and 5'-TTTCTTTTCAAAGACGGGTGA-3') was used for amplification of a 122-base pair fragment in exon 4 of *PRKN*. The *GAPDH* gene was amplified as a house-keeping gene. After 94°C for 30 s, the experimental reaction consisted of 40 cycles of 94°C for 5 s and 60°C for 34 s by the fluorescent dye SYBR Green I Kit (TransGen, Beijing, China). The value of threshold cycle ( $C_t$ ) was generated at every cycle during a run. The dose of the *PRKN* exon 4 relative to *GAPDH* was determined using the  $2^{-\Delta\Delta C_t}$  method. Gene dosage alternations were confirmed after triple analysis.

## Results

### Clinical history

The index case (II: 4) in this pedigree was a 62-year-old man born to healthy, non-consanguineous parents. His disease began at the age of 24 as uncoordinated movements in his left leg, leading to cycling instability. During the 2 years after the disease onset, his postural instabilities were slowly progressing to his right leg and arms, which manifested as festinating and abnormal stiff-legged gait, easy to fall and poor handwriting. The above symptoms were typically absent in the morning but worsened during the day. He had mild bradykinesia, no tremor, muscular atrophy or cognitive impairment. There were no indications of sphincteric or other autonomic symptoms. At the age of 30, he started pharmacological treatment with a daily dosage of 100 mg of levodopa showing a good response. Levodopa-induced dyskinesia (LID) appeared 5 years after the commencement of drug therapy. Neurological examinations showed increased muscular tension, hyperreflexia and Babinski sign in his left leg, other neurological and neuropsychiatric examinations indicated no abnormal results. An MRI brain scan revealed no significant abnormality. Video showing patient II: 4 is available in Supplementary Video S1.

Patient II: 6, who is the younger sister of II: 4, was examined at the age of 53. When she was 24 years old, she manifested parkinsonian features including rest tremor, bradykinesia, postural instability and hypomimia. She also had hyperreflexia and bilateral Babinski sign. After being treated with levodopa for the past 30 years, her symptoms have improved, and the LID has not appeared (Supplementary Video S1). Detailed clinical characteristics for the family are summarized in Table 1.

### Genetic analysis

WES was performed on four family members and two unrelated healthy controls. Average exome sequencing depths of  $95.11 \times$  (II: 2),  $100.65 \times$  (II: 4),  $94.33 \times$  (II: 5) and  $94.73 \times$  (II: 6) provided sufficient accuracies to call variants in 99.85–99.89% of the target regions. After filtering known variants and performing functional predictions, a total of

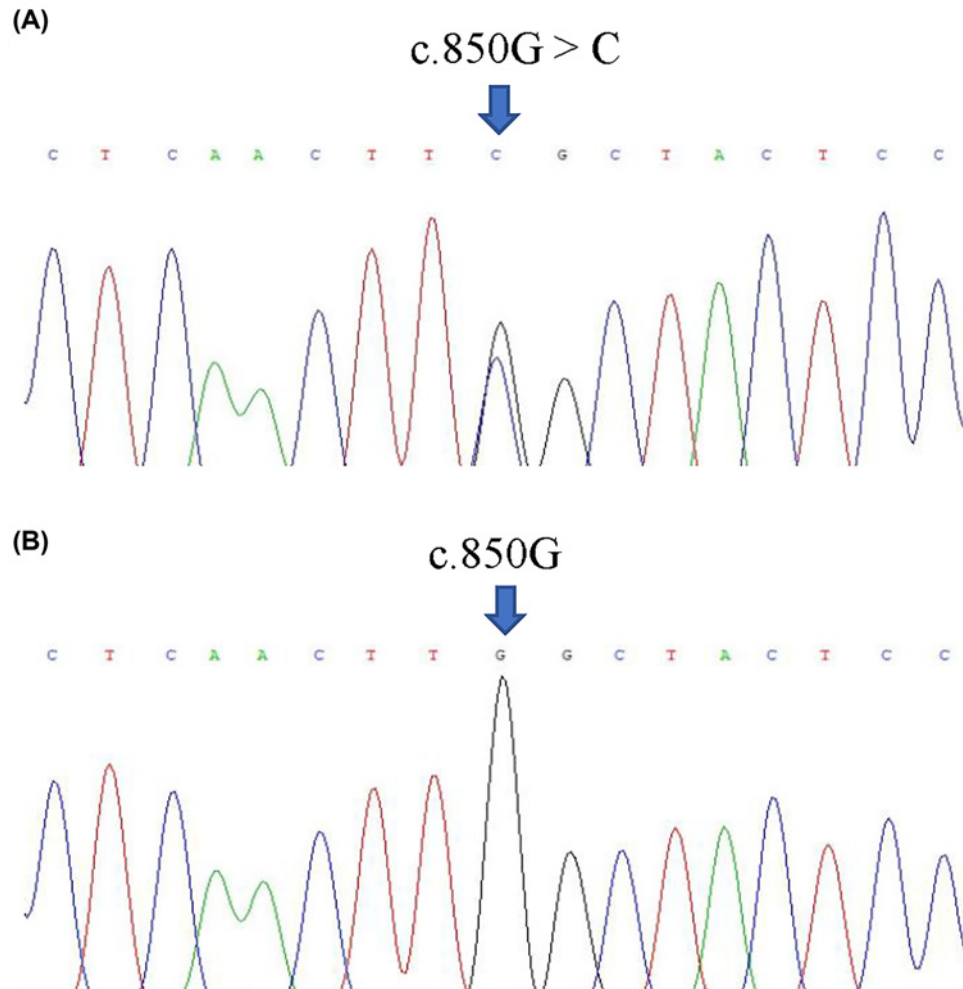

**Figure 2. Sanger sequencing of the c.850G > C variant in the *PRKN* gene**  
(A) The sequence of heterozygous c.850G > C variant in II: 4, II: 5 and II: 6. (B) The sequence of II: 4 and healthy control.

50944 SNPs, 2435 insertions and 2681 deletions in the exon regions were identified. We found that heterozygous *PRKN*: c.850G > C (p.G284R) variant was observed in II: 4, II: 5 and II: 6. Furthermore, heterozygous p.G284R variant was confirmed by Sanger sequencing (Figure 2A), and this variant was absent from unaffected family member II: 2 and healthy controls (Figure 2B). The p.G284R variant (NP 004553.2) was recorded in the NCBI SNP database (rs751037529). MutationTaster predicted that the variant has a high possibility of disease-causing with a high probability near 1. The conservation analysis showed that glycine at position 284 (p.G284) is highly conserved among various vertebrates based on multiple sequence alignments [19], which suggests that p.G284R might be a pathogenic mutation.

Then exon deletions were evaluated through the sequencing depths analysis in the *PRKN* gene, heterozygous *PRKN* exon 4 del was detected in II: 2, II: 4 and II: 6 (Figure 3A). RT-qPCR analysis for exon 4 of *PRKN* indicated that the dose of exon 4 in *PRKN* is decreased in the II: 2, II: 4 and II: 6 than that in II: 5 and healthy controls (Figure 3B), and the outcome obtained were consistent with the sequencing depths analysis. These results indicated that patients II: 4 and II:6 have compound heterozygous mutations in the *PRKN* gene (Table 1). The two other family members (II: 2 and II:5) lacking EOPD phenotypes only carry the single heterozygous mutation, identifying them as a carrier of the *PRKN* mutation. Except for the p.G284R variant and EX 4 del in the *PRKN* gene, no other variants in known PD disease-causing genes were found in the family members. We, therefore, identified the genetic cause of this family with EOPD.

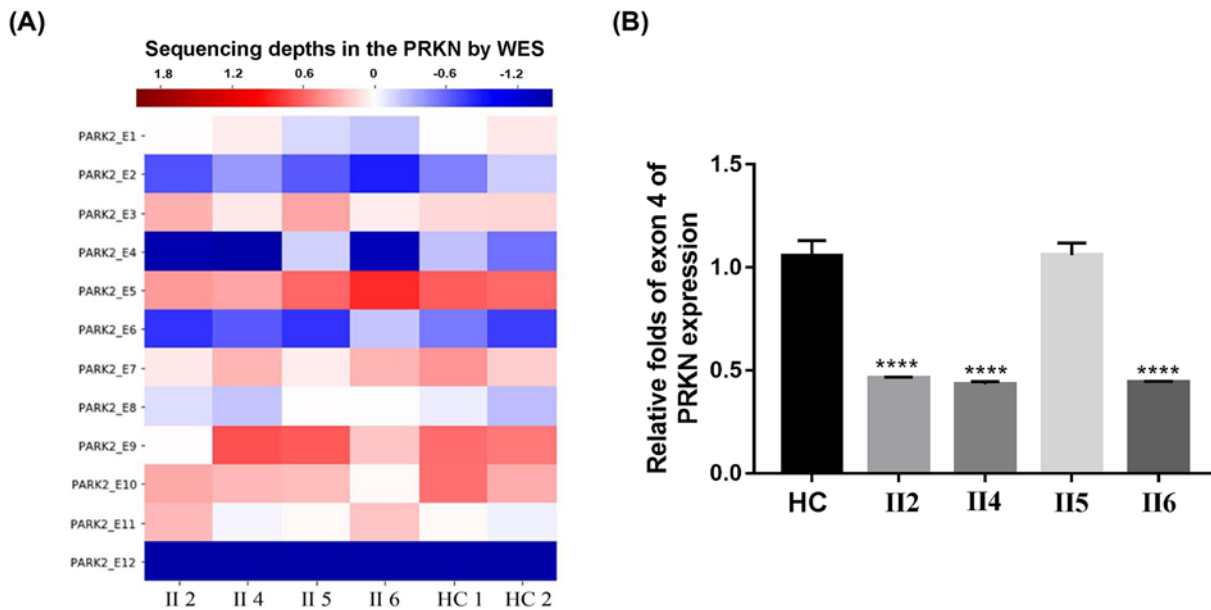

**Figure 3. Exon deletion analyses using WES and RT-qPCR**

(A) The sequencing depths analysis for PRKN exons of the pedigree and healthy controls (HC). The color-axis represents the sequencing depths performed by WES. The sequencing depths of samples II: 2, II: 4 and II: 6 in the PRKN exon 4 (PARK2\_E4) was relatively lower than that of healthy controls (HC1 and HC2). (B) RT-qPCR analysis for exon 4 of PRKN showed the relative expression level of exon 4 in PRKN is decreased in II: 2, II: 4 and II: 6 than that in II: 5 and HC. \*\*\*\* $P < 0.0001$ .

## Discussion

Although the patients in the present study presented with typical symptoms of PRKN-type EOPD, including onset at an early age, beneficial response to levodopa, diurnal fluctuations and the occurrence of levodopa-related motor complications. Other dopa-responsive disorders such as DRD should not be excluded during the diagnosis according to the clinical manifestations. Therefore, in the present study, we performed family-based genetic testing by using WES and finally identified a compound heterozygous mutation (p.G284R and EX 4 del) in the PRKN gene from a Chinese family with EOPD. In this family, two of four siblings of unaffected parents developed PD, indicating an autosomal recessive pattern of inheritance. The p.G284R variant was recorded in the SNP database with a frequency of  $<0.001\%$ , and to our knowledge, it is the first report of these mutations in compound heterozygotes.

The PRKN gene is a large 1.3 Mb gene with 12 exons that are mapped to chromosome 6q34 and encodes an E3 ubiquitin-proteasome system [20]. Mutations of the PRKN gene were first identified in several patients with autosomal recessive EOPD from consanguineous families in Japan [21]. Since then more than 200 different mutations in the PRKN gene have been identified in homozygous or compound heterozygous state of EOPD patients, including point mutations, complex rearrangements (exon deletions and multiplications) [22,23]. The G284 codon lies in exon 7 of the PRKN gene (NM\_004562). Although the PRKN p.G284R variant was included in the NCBI SNP database (rs751037529) and several studies have also reported the point mutation of p.G284R contributes to the development of EOPD [24–26], the frequency of this variant is very low ( $<0.001\%$ ). And more notably, the cases who have been reported to have p.G284R mutation in the PRKN gene, to our knowledge, are all Chinese descent. We suspect that PRKN p.G284R mutation could be more common in Chinese patients.

In the present study, all carriers with single heterozygous mutation (p.G284R or EX 4 del) were free of any neurological symptoms, which support the view that one heterozygous mutation in the PRKN gene was insufficient and a second mutation was required in EOPD. A recent study screened the phenotypic and genotypic data in more than 1100 patients with recessively inherited EOPD from a total of 3652 citations by using MDS Gene's standardized data extraction protocol and found that 53.2% of the patients carried a homozygous mutation, and 43.6% were compound heterozygous in a total of 139 different disease-causing sequence variants reported in the PRKN gene [5]. Mounting evidence indicated that a single PRKN mutation might be a risk factor for the late-onset disease [27,28]. Therefore, follow-up of the heterozygous mutation carriers is suggested to investigate their clinical features.



*PRKN*-type EOPD always shares similar clinical features to patients with DRD. The difficulty in distinguishing between those two forms of dopa-responsive disorders has already been widely reported [14,15]. It is suggested that a genetic mutation characteristic for DRD should also be included when testing for the causative genes in patients with EOPD. Strategies based on WES are very attractive because of their high-efficiency and universality of application, which means that WES is applicable for whatever the group of disorders and the clinical features [29]. It could be widely used in the future, for it could improve clinical diagnosis and genetic counseling of EOPD.

In conclusion, this report describes a new compound heterozygous mutation (p.G284R and EX 4 del) in the *PRKN* gene from a family with EOPD by performing WES. This finding may enrich the broad spectrum of genotypes in the EOPD and have implications for genetic counseling. This case also emphasizes the significance of WES in the diagnosis of EOPD. As prices drop, WES could be widely used in the future for its high-efficiency and full-coverage, which may help improve the clinical diagnosis and genetic counseling of EOPD.

### Competing Interests

The authors declare that there are no competing interests associated with the manuscript.

### Funding

This work was supported by the National Nature Science Foundation of China [grant number NSFC 81771521]; and the Key Research and Development Plan of Liaoning Science and Technology Department [grant number 2018225051].

### Author Contribution

T.L., D.K., and W.L. designed the project of this manuscript. T.L. and D.K. carried out all the experiments, statistical analysis and results interpretation. T.L. and Y.C. contributed to the drafting of the manuscript. W.L. revised the paper, contributed to the research concept, and research administration. All authors edited and approved the final version of the manuscript.

### Abbreviations

DRD, dopa-responsive dystonia; EOPD, early-onset Parkinson's disease; EX 4 del, exon 4 deletion; LID, levodopa-induced dyskinesia; PD, Parkinson's disease; SNPs, single nucleotide polymorphisms; WES, whole exome sequencing.

### References

- Moore, D., West, A., Dawson, V. and Dawson, T. (2005) Molecular pathophysiology of Parkinson's disease. *Annu. Rev. Neurosci.* **28**, 57–87, <https://doi.org/10.1146/annurev.neuro.28.061604.135718>
- Li, S. and Le, W. (2017) Milestones of Parkinson's disease research: 200 years of history and beyond. *Neurosci. Bull.* **33**, 598–602, <https://doi.org/10.1007/s12264-017-0178-2>
- Ascherio, A. and Schwarzschild, M. (2016) The epidemiology of Parkinson's disease: risk factors and prevention. *Lancet Neurol.* **15**, 1257–1272, [https://doi.org/10.1016/S1474-4422\(16\)30230-7](https://doi.org/10.1016/S1474-4422(16)30230-7)
- Erkkinen, M., Kim, M. and Geschwind, M. (2018) Clinical neurology and epidemiology of the major neurodegenerative diseases. *Cold. Spring. Harb. Perspect. Biol.* **10**, a033118, <https://doi.org/10.1101/cshperspect.a033118>
- Kasten, M., Hartmann, C., Hampf, J., Schaake, S., Westenberger, A., Dulovic, M. et al. (2018) Genotype, phenotype relations for the Parkinson's disease genes *Parkin*, *PINK1*, *DJ1*: MDSGene Systematic Review. *Mov. Disord.* **33**, 730–741, <https://doi.org/10.1002/mds.27352>
- Lücking, C., Dürr, A., Bonifati, V., Vaughan, J., Michele, G., Wood, N. et al. (2000) Association between early-onset Parkinson's disease and mutations in the *parkin* gene. *N. Engl. J. Med.* **342**, 1560–1567, <https://doi.org/10.1056/NEJM200005253422103>
- Schrag, A. and Schott, J. (2006) Epidemiological, clinical, and genetic characteristics of early-onset parkinsonism. *Lancet Neurol.* **5**, 355–363, [https://doi.org/10.1016/S1474-4422\(06\)70411-2](https://doi.org/10.1016/S1474-4422(06)70411-2)
- Lees, A., Hardy, J. and Revesz, T. (2009) Parkinson's disease. *Lancet* **373**, 55–66, [https://doi.org/10.1016/S0140-6736\(09\)60492-X](https://doi.org/10.1016/S0140-6736(09)60492-X)
- Suzanne, L. and Alexis, B. (2009) Parkinson's disease: from monogenic forms to genetic susceptibility factors. *Hum. Mol. Genet.* **18**, 48–59, <https://doi.org/10.1093/hmg/ddp012>
- Le, W., Xu, P., Jankovic, J., Jiang, H., Vassiliadis, D.K. et al. (2003) Mutations in *NR4A2* associated with familial Parkinson disease. *Nat. Genet.* **33**, 85–89, <https://doi.org/10.1038/ng1066>
- Puschmann, A. (2013) Monogenic Parkinson's disease and parkinsonism: clinical phenotypes and frequencies of known mutations. *Parkinsonism Relat. Disord.* **19**, 407–415, <https://doi.org/10.1016/j.parkreldis.2013.01.020>
- Singleton, A., Farrer, M. and Vincenzo, B. (2013) The genetics of Parkinson's disease: progress and therapeutic implications. *Mov. Disord.* **28**, 14–23, <https://doi.org/10.1002/mds.25249>
- Trinh, J., Lohmann, K., Baumann, H., Balck, A., Borsche, M., Tunc, S. et al. (2019) Utility and implications of exome sequencing in early-onset Parkinson's disease. *Mov. Disord.* **34**, 133–137
- Potulska, A., Hoffman, D., Lukawska, M. and Kostera, A. (2017) Dopa-responsive dystonia or early-onset Parkinson disease—Genotype-phenotype correlation. *Neurol. Neurochir. Pol.* **51**, 1–6, <https://doi.org/10.1016/j.pjnns.2016.07.013>

- 15 Tassin, J., Dürr, A., Bonnet, A., Gil, R., Echenne, B. et al. (2000) Levodopa-responsive dystonia. GTP cyclohydrolase I or parkin mutations? *Brain* **123**, 11–12
- 16 Wijemanne, S. and Jankovic, J. (2015) Dopa-responsive dystonia—clinical and genetic heterogeneity. *Nat. Rev. Neurol.* **11**, 414–424, <https://doi.org/10.1038/nrneurol.2015.86>
- 17 Guo, J., Zhang, L., Li, K., Mei, J., Chen, C. et al. (2018) Coding mutations in NUS1 contribute to Parkinson's disease. *Proc. Natl. Acad. Sci. U.S.A.* **115**, 11567–11572, <https://doi.org/10.1073/pnas.1809969115>
- 18 Chiang, C., Layer, R., Faust, G., Lindberg, M., Hall, I. et al. (2015) SpeedSeq: ultra-fast personal genome analysis and interpretation. *Nat. Methods* **12**, 966–968, <https://doi.org/10.1038/nmeth.3505>
- 19 Chen, H., Huang, X., Yuan, L., Xia, H., Xu, H., Deng, H. et al. (2016) A homozygous parkin p.G284R mutation in a Chinese family with autosomal recessive juvenile parkinsonism. *Neurosci. Lett.* **624**, 100–104, <https://doi.org/10.1016/j.neulet.2016.05.011>
- 20 Le, W. and Appel, S.H. (2004) Mutant genes responsible for Parkinson's disease. *Curr. Opin. Pharmacol.* **4**, 79–84, <https://doi.org/10.1016/j.coph.2003.09.005>
- 21 Kitada, T., Asakawa, S., Hattori, N., Matsumine, H., Shimizu, N. et al. (1998) Mutations in the parkin gene cause autosomal recessive juvenile parkinsonism. *Nature* **392**, 605–608, <https://doi.org/10.1038/33416>
- 22 Deng, H., Le, W., Shahed, J., Xie, W. and Jankovic, J. (2008) Mutation analysis of the parkin and PINK1 genes in American Caucasian early-onset Parkinson disease families. *Neurosci. Lett.* **430**, 18–22, <https://doi.org/10.1016/j.neulet.2007.10.018>
- 23 Hattori, N. and Mizuno, Y. (2017) Twenty years since the discovery of the parkin gene. *J. Neural Transm.* **124**, 1–18, <https://doi.org/10.1007/s00702-017-1742-7>
- 24 Fang, Y., Mao, F., Zhu, M. and Li, X. (2019) Compound heterozygous mutations in PARK2 causing early-onset Parkinson disease: a case report. *Medicine (Baltimore)* **98**, e14228, <https://doi.org/10.1097/MD.00000000000014228>
- 25 Wu, R., Bounds, R., Lincoln, S., Hulihan, M., Lin, C., Farrer, M. et al. (2005) Parkin mutations and early-onset Parkinsonism in Taiwanese cohort. *Arch. Neurol.* **62**, 82–87, <https://doi.org/10.1001/archneur.62.1.82>
- 26 Zhang, B., Hu, Z., Yin, X., Cai, M., Zhao, G., Luo, W. et al. (2010) Mutation analysis of parkin and PINK1 genes in early-onset Parkinson's disease in China. *Neurosci. Lett.* **477**, 19–22, <https://doi.org/10.1016/j.neulet.2010.04.026>
- 27 Foroud, T., Uniacke, S., Liu, L., Pankratz, N., Rudolph, A., Nichols, W. et al. (2003) Heterozygosity for a mutation in the parkin gene leads to later onset Parkinson disease. *Neurology* **60**, 796–801, <https://doi.org/10.1212/01.WNL.0000049470.00180.07>
- 28 Wirdefeldt, K., Adami, H., Cole, P., Trichopoulos, D. and Mandel, J. (2011) Epidemiology and etiology of Parkinson's disease: a review of the evidence. *Eur. J. Epidemiol.* **26**, S1–S58, <https://doi.org/10.1007/s10654-011-9581-6>
- 29 Montaut, S., Tranchant, C., Drouot, N., Rudolf, G., Guissart, C., Nitschké, P. et al. (2018) Assessment of a targeted gene panel for identification of genes associated with movement disorders. *JAMA Neurol.* **75**, 1234–1245, <https://doi.org/10.1001/jamaneurol.2018.1478>
